# Supplementary material for: Nocardia aciditolerans sp. nov., isolated from a spruce forest soil
Source: PubMed Central journal article supplement (PMC3621993; doi:10.1007/s10482-013-9887-3), 2013-02-01
Supplement: 10482_2013_9887_MOESM1_ESM.pdf [file 10482_2013_9887_MOESM1_ESM.pdf]

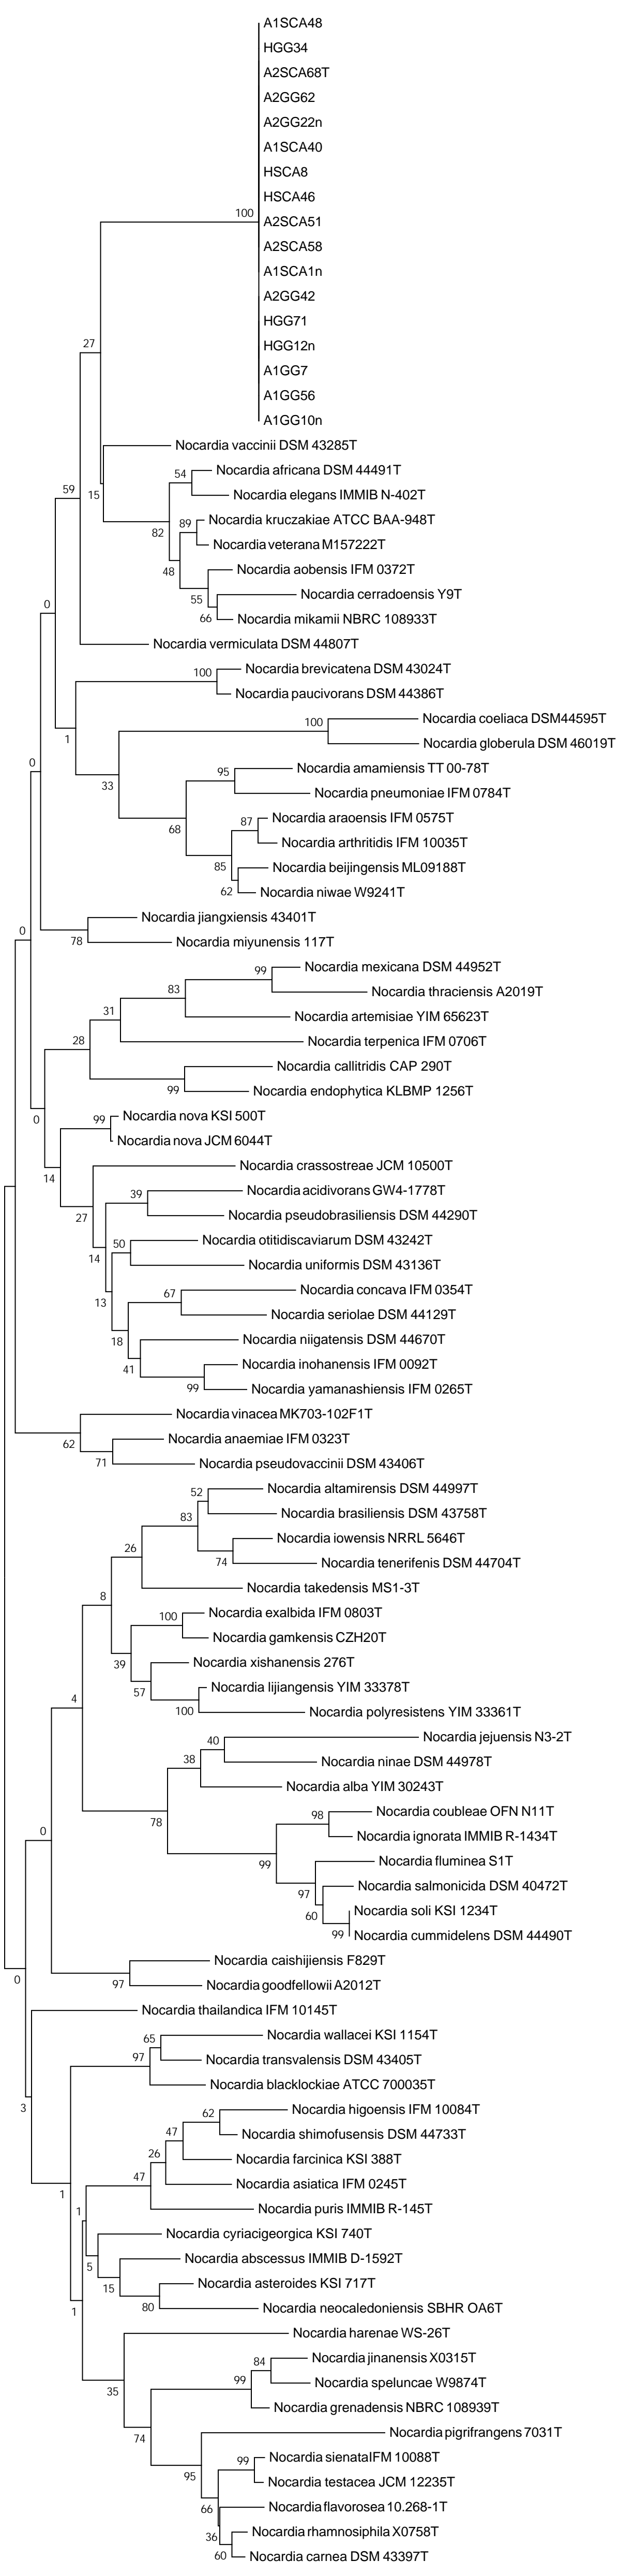

0.005
